# Supplementary material for: Impact of Bottom-Sediment Removal on 137Cs Contamination in an Urban Pond
Source: MDPI journal article supplement (doi:10.3390/land12020519), 2023-02-20
Supplement: s1 [file s1]

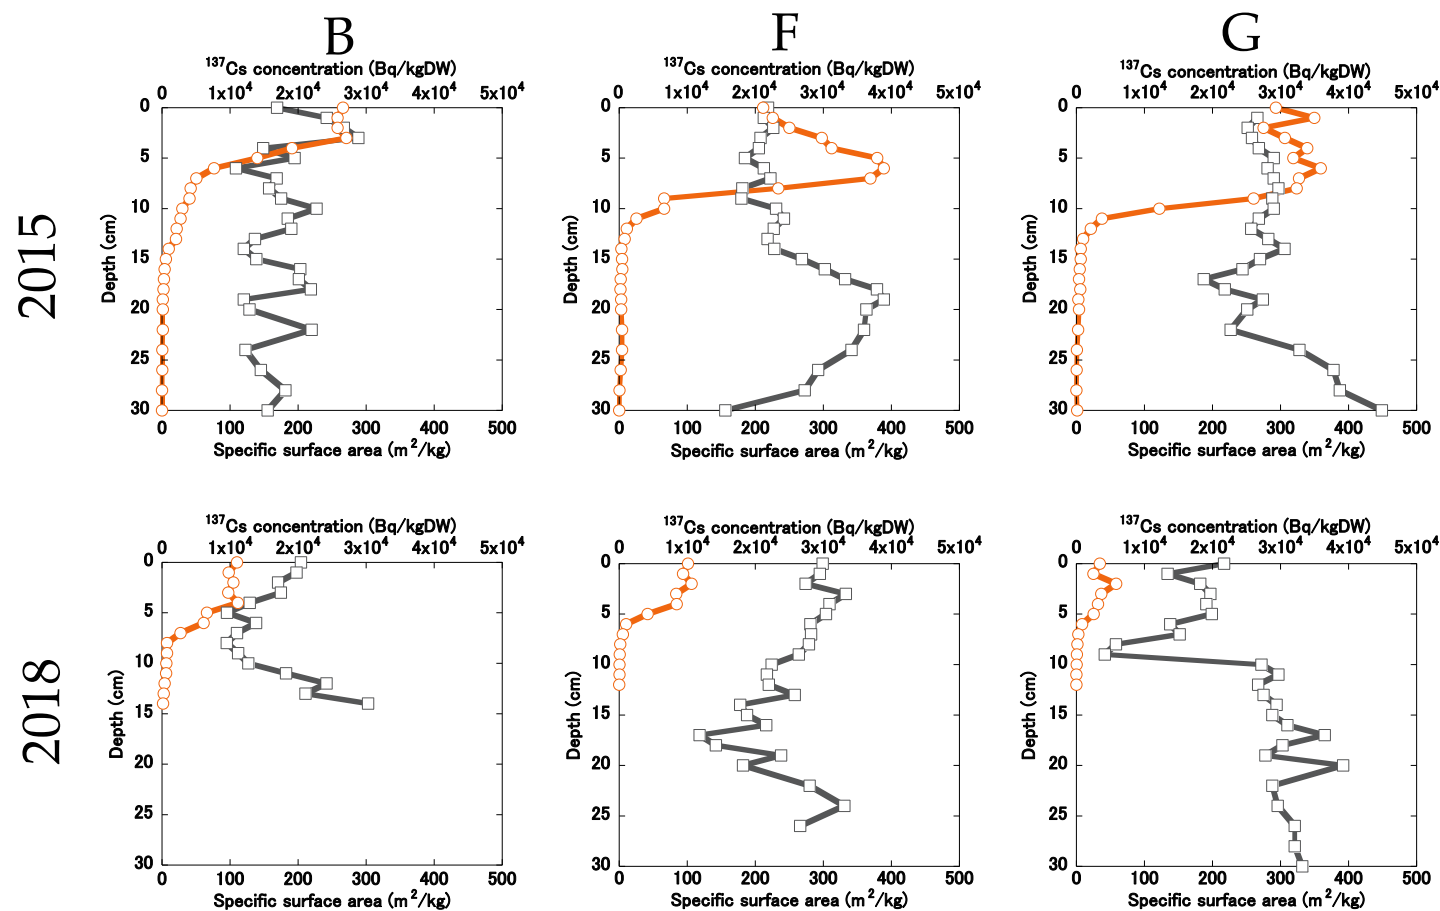

Figure S1. Depth distribution of  $^{137}\text{Cs}$  concentration and specific surface area at site B, F, and G in 2015 and 2018. Specific surface area values represent all data measured.

**Table S1.** Water quality of pond water in 2015 and 2018. Single asterisk (\*) following the p-value mean  $p < 0.05$ . p-values were calculated using t-test.

| Water quality                      |          | 2015 |        |       | 2018 |        |       | p-value |
|------------------------------------|----------|------|--------|-------|------|--------|-------|---------|
|                                    |          | n    | Mean   | SD *  | n    | Mean   | SD *  |         |
| Water temperature                  | (°C)     | 7    | 18.8   | 6.2   | 6    | 22.4   | 8.5   | 0.440   |
| EC                                 | (mS/m)   | 7    | 17.4   | 3.1   | 6    | 16.7   | 2.4   | 0.668   |
| ORP                                | (mV)     | 7    | 236    | 43    | 6    | 255    | 37    | 0.453   |
| pH                                 |          | 7    | 7.63   | 0.96  | 6    | 8.50   | 0.89  | 0.149   |
| RpH                                |          | 7    | 8.03   | 0.78  | 6    | 8.60   | 0.68  | 0.231   |
| Turbidity                          | (NTU)    | 7    | 19     | 13    | 6    | 61     | 58    | 0.119   |
| in vivo chlorophyll                | (RFU)    | 7    | 1255   | 564   | 6    | 931    | 924   | 0.492   |
| Chl. <i>a</i> con.                 | (µg/L)   | 7    | 141    | 47    | 6    | 160    | 79    | 0.625   |
| SS con.                            | (mg/L)   | 7    | 23.7   | 4.9   | 6    | 41.5   | 17.9  | 0.040*  |
| VSS con.                           | (mg/L)   | 7    | 13.7   | 2.3   | 6    | 24.4   | 19.4  | 0.210   |
| NH <sub>4</sub> -N con.            | (mg-N/L) | 7    | 0.018  | 0.020 | 6    | 0.028  | 0.054 | 0.675   |
| NO <sub>2</sub> -N con.            | (mg-N/L) | 7    | 0.012  | 0.011 | 6    | 0.006  | 0.005 | 0.235   |
| NO <sub>3</sub> -N con.            | (mg-N/L) | 7    | 0.140  | 0.137 | 6    | 0.173  | 0.183 | 0.741   |
| PO <sub>4</sub> -P con.            | (mg-P/L) | 7    | 0.002  | 0.003 | 6    | 0.013  | 0.015 | 0.104   |
| DSi con.                           | (mM)     | 7    | 0.134  | 0.090 | 6    | 0.114  | 0.069 | 0.703   |
| Na <sup>+</sup> con.               | (mg/L)   | 7    | 9.091  | 2.364 | 6    | 9.628  | 1.828 | 0.685   |
| K <sup>+</sup> con.                | (mg/L)   | 7    | 2.071  | 0.208 | 6    | 2.244  | 0.202 | 0.191   |
| Mg <sup>2+</sup> con.              | (mg/L)   | 7    | 3.085  | 0.593 | 6    | 3.029  | 0.825 | 0.898   |
| Ca <sup>2+</sup> con.              | (mg/L)   | 7    | 19.933 | 3.073 | 6    | 19.185 | 3.352 | 0.707   |
| Cl <sup>-</sup> con.               | (mg/L)   | 7    | 7.628  | 1.960 | 6    | 9.070  | 2.094 | 0.264   |
| NO <sub>3</sub> <sup>-</sup> con.  | (mg/L)   | 7    | 0.394  | 0.666 | 6    | 0.306  | 0.685 | 0.834   |
| SO <sub>4</sub> <sup>2-</sup> con. | (mg/L)   | 7    | 16.568 | 3.194 | 6    | 18.425 | 1.561 | 0.258   |
| DIC con.                           | (mg-C/L) | 7    | 12.312 | 1.692 | 6    | 11.416 | 4.398 | 0.656   |
| DOC con.                           | (mg-C/L) | 7    | 2.284  | 0.484 | 6    | 3.295  | 0.711 | 0.018*  |

\* Standard deviation

**Table S2.** Correlations between  $^{137}\text{Cs}$  concentration in SS ( $C_{\text{Cs-ss}}$ ), dissolved  $^{137}\text{Cs}$  concentration ( $C_{\text{Cs-dis}}$ ),  $K_d$  and water quality in pond water in 2015 and 2018. Double asterisks (\*\*) and single asterisk (\*) following the correlation coefficient mean  $p < 0.01$  and  $p < 0.05$ , respectively. p-value were calculated using t-test.

| Parameter                          | $C_{\text{Cs-ss}}$ |         | $C_{\text{Cs-dis}}$ |         | $K_d$    |        |
|------------------------------------|--------------------|---------|---------------------|---------|----------|--------|
|                                    | 2015               | 2018    | 2015                | 2018    | 2015     | 2018   |
| Water temperature                  | 0.679              | 0.928** | 0.514               | 0.651   | 0.549    | -0.609 |
| EC                                 | -0.574             | -0.501  | -0.266              | -0.541  | -0.656   | 0.884* |
| ORP                                | -0.465             | -0.439  | -0.611              | 0.173   | 0.044    | -0.219 |
| pH                                 | -0.196             | -0.142  | 0.061               | 0.002   | -0.479   | 0.315  |
| RpH                                | -0.132             | -0.182  | 0.053               | 0.013   | -0.331   | 0.311  |
| Turbidity                          | -0.003             | 0.275   | 0.148               | 0.509   | -0.400   | -0.439 |
| in vivo chlorophyll                | -0.505             | -0.819* | -0.212              | -0.649  | -0.695   | 0.829* |
| Chl. <i>a</i> con.                 | 0.097              | 0.058   | 0.255               | 0.289   | -0.241   | -0.111 |
| SS con.                            | 0.210              | 0.440   | 0.324               | 0.362   | -0.372   | -0.356 |
| VSS con.                           | -0.459             | 0.182   | -0.164              | 0.287   | -0.503   | -0.248 |
| NH <sub>4</sub> -N con.            | -0.253             | 0.144   | -0.449              | 0.924** | 0.535    | -0.551 |
| NO <sub>2</sub> -N con.            | -0.429             | -0.090  | -0.537              | 0.021   | 0.100    | -0.342 |
| NO <sub>3</sub> -N con.            | 0.312              | -0.138  | -0.171              | -0.350  | 0.846*   | -0.037 |
| PO <sub>4</sub> -P con.            | -0.145             | 0.378   | -0.540              | 0.091   | 0.786*   | -0.230 |
| DSi con.                           | 0.125              | 0.253   | -0.048              | 0.692   | 0.446    | -0.500 |
| Na <sup>+</sup> con.               | -0.642             | -0.252  | -0.293              | -0.203  | -0.727   | 0.774  |
| K <sup>+</sup> con.                | -0.669             | 0.476   | -0.554              | 0.492   | -0.232   | 0.146  |
| Mg <sup>2+</sup> con.              | -0.679             | -0.542  | -0.268              | -0.642  | -0.814*  | 0.877* |
| Ca <sup>2+</sup> con.              | -0.455             | -0.598  | 0.028               | -0.65   | -0.877** | 0.767  |
| Cl <sup>-</sup> con.               | -0.774*            | 0.058   | -0.427              | 0.028   | -0.699   | 0.604  |
| NO <sub>3</sub> <sup>-</sup> con.  | -0.025             | 0.035   | -0.236              | 0.021   | 0.198    | -0.275 |
| SO <sub>4</sub> <sup>2-</sup> con. | -0.484             | -0.013  | -0.044              | 0.360   | -0.800*  | 0.346  |
| DIC con.                           | -0.509             | -0.311  | -0.049              | 0.436   | -0.934** | 0.039  |
| DOC con.                           | -0.656             | 0.125   | -0.734              | 0.371   | 0.159    | 0.242  |
